# Supplementary material for: Effect of 8-week frequency-specific electrical muscle stimulation combined with resistance exercise training on muscle mass, strength, and body composition in men and women: a feasibility and safety study
Source: PeerJ. 2023 Oct 16;11:e16303. doi: 10.7717/peerj.16303 (PMC10586320; doi:10.7717/peerj.16303)
Supplement: Supplemental Information 1 [file peerj-11-16303-s001.xlsx]

## Sheet: Basic imformation
			Age	Height	Weight
	SAS	No	(years)	(cm)	(kg)
Placebo	a	1	21	175	61.4			Age	Mean	SD	SEM	SAS	Pvalue
	a	2	21	186	77		1	Placebo	21.5714	1.6968	0.453488	a
	a	3	21	170	75.1		2	EMS	21.7857	2.00686	0.536355	a	0.762795
	a	4	21	184	73.8
	a	5	23	185	83			Height	Mean	SD	SEM	SAS	Pvalue
	a	6	24	180	92.2		1	Placebo	168.786	11.8138	3.15737	a
	a	7	21	161	60.1		2	EMS	167.771	9.90069	2.64607	a	0.80751
	a	8	20	158	49.8
	a	9	20	174	64.1			Weight	Mean	SD	SEM	SAS	Pvalue
	a	10	20	159	56.3		1	Placebo	64.1714	14.393	3.84668	a
	a	11	22	164	60.5		2	EMS	68.4786	15.5088	4.14489	a	0.453146
	a	12	21	155	40.9
	a	13	26	159	56.4
	a	14	21	153	47.8
EMD	b	15	22	170	71.6
	b	16	20	176	76.9
	b	17	22	178	105
	b	18	21	180	75.7
	b	19	22	170	71.2
	b	20	25	181	88.2
	b	21	21	176	76.6
	b	22	20	160	59.4
	b	23	22	160	52.8
	b	24	20	157.8	56.5
	b	25	21	164	62.5
	b	26	22	162	53.5
	b	27	20	147	48.5
	b	28	27	167	60.3

## Sheet: Blood biochemical
				AST (U/L)			ALT (U/L)			BUN (mg/dL)			CREA (md/dL)			UA (md/dL)			TP (md/dL)			FFA (mmol/L)
	SAS	No	Pre	Mid	Post	Pre	Mid	Post	Pre	Mid	Post	Pre	Mid	Post	Pre	Mid	Post	Pre	Mid	Post	Pre	Mid	Post			AST
Placebo	a	1	22	23	24	20	23	20	16.8	16.1	19.3	1.08	1.03	1.05	6.3	6.3	6.2	7.1	7.2	7.1	0.53	0.46	0.46				Pre	Mean	SD	SEM	SAS	Pvalue		Pre-Mid	AST	ALT	BUN	CREA	UA	TP	FFA
	a	2	20	21	20	23	25	22	19.6	19.6	19.5	1.19	1.2	1.24	5.8	5.8	5.8	7.4	7.5	7.3	0.32	0.31	0.34			1	Placebo	20.1429	2.62699	0.702094	a			Placebo	0.0242151	0.0753455	0.982346	0.159634	0.217796	0.426435	0.069095
	a	3	20	20	23	24	25	23	16.5	15.7	16.2	1.11	1.11	1.12	5.5	5.6	5.6	7.4	7.5	7.4	0.56	0.47	0.48			2	EMS	20.6429	2.56026	0.684259	a	0.614352		EMS	0.0762801	0.217796	0.63172	0.828154	0.750521	0.537712	0.0165688
	a	4	19	19	20	25	22	23	20.6	22.2	21.6	1.16	1.11	1.15	6	6	6.2	7.2	7.3	7.2	0.55	0.47	0.48
	a	5	21	19	28	19	21	20	15.6	15.2	15.8	1.25	1.23	1.23	5.2	5	4.6	7.6	7.8	7.5	0.44	0.39	0.39				Mid	Mean	SD	SEM	SAS	Pvalue		Mid-Post	AST	ALT	BUN	CREA	UA	TP	FFA
	a	6	17	16	17	20	21	20	17.6	17.5	17.2	1.17	1.13	1.17	5.5	5.5	5.7	7.3	7.4	7.3	0.19	0.27	0.25			1	Placebo	19.1429	2.65611	0.709877	a			Placebo	0.0982907	0.792906	0.326481	0.343944	0.68158	0.00382656	0.6987
	a	7	15	15	16	22	23	23	15.9	14.4	15	1.11	1.1	1.1	4.4	4.4	4.1	7.5	7.6	7.5	0.36	0.34	0.35			2	EMS	19.4286	2.20887	0.590346	a	0.759521		EMS	0.151928	0.860573	0.152513	0.575707	0.264115	1	0.335561
	a	8	18	16	18	21	22	23	13.5	13.4	13.3	0.94	1.15	1.01	3.9	3.9	3.8	7.8	7.9	7.65	0.26	0.3	0.3
	a	9	19	17	20	20	21	22	13.5	13.4	13.9	0.95	1.16	1.02	3.7	3.7	3.2	6.9	6.8	7	0.22	0.3	0.29				Post	Mean	SD	SEM	SAS	Pvalue		Pre-Post	AST	ALT	BUN	CREA	UA	TP	FFA
	a	10	22	19	20	20	21	22	13.9	14.4	14.2	1.1	1.18	1.08	5.3	5.2	4.6	7.2	7.3	7.3	0.65	0.53	0.54			1	Placebo	20.4286	3.15532	0.843295	a			Placebo	0.722563	0.067864	0.307174	0.119018	0.494768	0.332063	0.0615892
	a	11	22	22	22	18	18	20	12.4	15.5	14.1	0.89	0.99	0.99	4.7	4.2	4.1	7.1	7.2	7.1	0.48	0.44	0.43			2	EMS	20.2857	2.46291	0.658241	a	0.894856		EMS	0.291633	0.459116	0.546213	0.536507	0.263579	0.233688	0.0752542
	a	12	26	23	20	16	16	16	14	14	14	1.14	1.16	1.15	4.3	4.2	4	7.8	7.1	7	0.75	0.59	0.59
	a	13	20	17	17	17	17	21	16.2	14.7	15.2	1.13	1.13	1.13	4.8	4.6	4.2	7.2	7.4	7.3	0.58	0.49	0.5			ALT
	a	14	21	21	21	16	16	18	13.6	13.5	14.2	1.05	1.07	1.08	3.1	3.3	4.8	7.1	7.3	7.1	0.38	0.38	0.36				Pre	Mean	SD	SEM	SAS	Pvalue
EMD	b	15	21	18	20	18	19	17	14.2	13.5	14.3	1.04	1.05	1.03	4.6	4.5	4.4	6.7	7.1	6.8	0.65	0.51	0.51			1	Placebo	20.0714	2.78635	0.744683	a
	b	16	20	17	21	19	18	19	11.5	11.2	12	1.03	1.02	1.05	6.8	6.5	6.8	7.3	7.4	7.4	0.3	0.31	0.35			2	EMS	19.5714	3.00549	0.803251	a	0.651857
	b	17	21	22	21	20	20	20	14.1	14.1	14.6	1.13	1.18	1.2	5.4	5.1	5.1	7.7	7.5	7.6	0.39	0.37	0.37
	b	18	21	17	21	22	21	23	14.8	15.3	15.6	1.09	1.1	1.09	2.6	3.2	3.2	7.3	7.4	7.4	0.22	0.22	0.22				Mid	Mean	SD	SEM	SAS	Pvalue
	b	19	22	23	24	17	17	16	16.4	16.4	16.8	1.12	1.13	1.16	6.4	6.5	6.2	7.8	7.6	7.7	0.28	0.31	0.34			1	Placebo	20.7857	2.99175	0.799578	a
	b	20	18	19	17	16	17	16	15	15.1	15.2	1.25	1.21	1.24	5.5	5.4	5.2	7.1	7.2	7.1	0.27	0.24	0.26			2	EMS	19.8571	2.90509	0.776419	a	0.41235
	b	21	18	19	17	21	21	21	18.2	18.4	17.7	1.2	1.16	1.19	6.6	6.7	6.7	7.7	7.5	7.6	0.82	0.67	0.7
	b	22	24	21	22	22	23	20	16.5	15.7	15.7	1.08	1.06	1.01	5.7	5.3	5.1	7.9	7.6	7.9	0.58	0.41	0.4				Post	Mean	SD	SEM	SAS	Pvalue
	b	23	17	18	17	23	23	24	19.9	20	20.4	1.16	1.15	1.16	5.5	5.2	5.2	6.4	6.9	6.6	0.39	0.39	0.38			1	Placebo	20.9286	2.09263	0.55928	a
	b	24	24	22	22	17	18	17	19.3	18.5	18	1.03	1.05	1.07	5.3	5.4	5.5	7.8	7.6	7.8	0.3	0.31	0.35			2	EMS	19.7857	3.46806	0.926879	a	0.302894
	b	25	24	22	24	15	15	16	16.7	17.3	17.3	1.02	1.02	1.05	3.8	4.2	3.7	7.4	7.4	7.6	0.6	0.5	0.45
	b	26	19	20	20	19	19	20	14.1	15.1	15.2	1.08	1.09	1.07	4.3	4.2	4.2	6.7	7.1	7	0.58	0.43	0.4			BUN
	b	27	23	17	21	19	21	20	19.9	18.8	18.4	1.09	1.1	1.1	4.8	4.3	4.5	7.2	7.2	7.1	0.67	0.66	0.69				Pre	Mean	SD	SEM	SAS	Pvalue
	b	28	17	17	17	26	26	28	12.4	12.5	13.8	1.04	1.06	1.02	3.3	3.7	3.5	7.2	7.3	7.2	0.37	0.35	0.36			1	Placebo	15.6929	2.4193	0.646586	a
																										2	EMS	15.9286	2.67594	0.715175	a	0.808795
																											Mid	Mean	SD	SEM	SAS	Pvalue
																										1	Placebo	15.6857	2.53949	0.678707	a
																										2	EMS	15.85	2.55305	0.682332	a	0.865778
																											Post	Mean	SD	SEM	SAS	Pvalue
																										1	Placebo	15.9643	2.53335	0.677066	a
																										2	EMS	16.0714	2.17483	0.581248	a	0.905372
																										CREA
																											Pre	Mean	SD	SEM	SAS	Pvalue
																										1	Placebo	1.09071	0.102166	0.027305	a
																										2	EMS	1.09714	0.0688844	0.0184101	a	0.846959
																											Mid	Mean	SD	SEM	SAS	Pvalue
																										1	Placebo	1.125	0.0645398	0.017249	a
																										2	EMS	1.09857	0.0598533	0.0159965	a	0.271576
																											Post	Mean	SD	SEM	SAS	Pvalue
																										1	Placebo	1.10857	0.0767471	0.0205115	a
																										2	EMS	1.10286	0.0739468	0.0197631	a	0.84256
																										UA
																											Pre	Mean	SD	SEM	SAS	Pvalue
																										1	Placebo	4.89286	0.931883	0.249056	a
																										2	EMS	5.04286	1.2327	0.329454	a	0.719612
																											Mid	Mean	SD	SEM	SAS	Pvalue
																										1	Placebo	4.83571	0.927865	0.247982	a
																										2	EMS	5.01429	1.06688	0.285137	a	0.64055
																											Post	Mean	SD	SEM	SAS	Pvalue
																										1	Placebo	4.77857	0.960111	0.2566	a
																										2	EMS	4.95	1.12027	0.299404	a	0.667417
																										TP
																											Pre	Mean	SD	SEM	SAS	Pvalue
																										1	Placebo	7.32857	0.270124	0.0721937	a
																										2	EMS	7.3	0.462435	0.123591	a	0.843706
																											Mid	Mean	SD	SEM	SAS	Pvalue
																										1	Placebo	7.37857	0.2806	0.0749935	a
																										2	EMS	7.34286	0.217377	0.0580964	a	0.709806
																											Post	Mean	SD	SEM	SAS	Pvalue
																										1	Placebo	7.26786	0.197686	0.0528337	a
																										2	EMS	7.34286	0.387724	0.103624	a	0.526636
																										FFA
																											Pre	Mean	SD	SEM	SAS	Pvalue
																										1	Placebo	0.447857	0.167064	0.0446498	a
																										2	EMS	0.458571	0.186748	0.0499104	a	0.874139
																											Mid	Mean	SD	SEM	SAS	Pvalue
																										1	Placebo	0.41	0.0975863	0.026081	a
																										2	EMS	0.405714	0.138382	0.036984	a	0.92536
																											Post	Mean	SD	SEM	SAS	Pvalue
																										1	Placebo	0.411429	0.101364	0.0270908	a
																										2	EMS	0.412857	0.138643	0.037054	a	0.975431

## Sheet: Body composition
			Body weight (g)		BMI(kg/m2)		LBM(kg)		FBM(%)		Delta LBM(kg)	Delta FBM(%)
	SAS	No	Pre	Post	Pre	Post	Pre	Post	Pre	Post	Post	Post			Body weight (g)								Pre-Post	BW	BMI	LBM	FBM
Placebo	a	1	61.4	64.2	20.049	20.9633	30.6	30.7	12.6	16.3	0.1	3.7				Pre	Mean	SD	SEM	SAS	Pvalue		Placebo	3.21021e-06	6.02937e-06	0.561523	0.000365504
	a	2	77	80.5	22.2569	23.2686	37	38.4	15.2	16.3	1.4	1.1			1	Placebo	64.1714	14.393	3.84668	a			EMS	1.034e-05	3.53563e-06	7.89402e-06	0.0179136
	a	3	75.1	75.7	25.9862	26.1938	33.5	33.7	21.6	21.8	0.2	0.2			2	EMS	68.4786	15.5088	4.14489	a	0.453146
	a	4	73.8	77	21.7982	22.7434	33.9	34.4	19.5	21.9	0.5	2.4
	a	5	83	84.4	24.2513	24.6603	38.5	37	19.5	21.8	-1.5	2.3				Post	Mean	SD	SEM	SAS	Pvalue
	a	6	92.2	94.7	28.4568	29.2284	41.5	40.4	22.2	24.8	-1.1	2.6			1	Placebo	66.4571	14.2257	3.80198	a
	a	7	60.1	62.3	23.1858	24.0346	27.1	27.3	19.6	21.6	0.2	2			2	EMS	66.9429	15.2467	4.07485	a	0.931221
	a	8	49.8	52.2	19.9487	20.9101	19.7	20.5	26	27	0.8	1
	a	9	64.1	64.8	21.1719	21.4031	27.8	27.3	22.1	24.3	-0.5	2.2			BMI(kg/m2)
	a	10	56.3	57.2	22.2697	22.6257	22.7	23	26.2	26.3	0.3	0.1				Pre	Mean	SD	SEM	SAS	Pvalue
	a	11	60.5	64.1	22.4941	23.8325	26.6	24.5	24.7	26	-2.1	1.3			1	Placebo	22.2587	2.76789	0.73975	a
	a	12	40.9	45	17.0239	18.7305	20.1	20.6	7.8	15.2	0.5	7.4			2	EMS	24.0428	3.16394	0.845598	a	0.124577
	a	13	56.4	58.3	22.3092	23.0608	23.5	22.9	24.4	28.5	-0.6	4.1
	a	14	47.8	50	20.4195	21.3593	20.4	20.1	23.3	26.1	-0.3	2.8				Post	Mean	SD	SEM	SAS	Pvalue
EMD	b	15	71.6	70.6	24.7751	24.4291	32.2	34	20.2	17.2	1.8	-3			1	Placebo	23.0725	2.56767	0.686239	a
	b	16	76.9	76.7	24.8257	24.7611	34.2	34.8	21.2	20	0.6	-1.2			2	EMS	23.5011	3.13058	0.836683	a	0.695346
	b	17	105	102.8	33.1398	32.4454	39.9	41.4	31.7	33.6	1.5	1.9
	b	18	75.7	74.1	23.3642	22.8704	37.1	38.2	12.3	12.2	1.1	-0.1			LBM(kg)
	b	19	71.2	69.1	24.6367	23.91	35.1	35.4	14.4	11	0.3	-3.4				Pre	Mean	SD	SEM	SAS	Pvalue
	b	20	88.2	86.2	26.9223	26.3118	37.5	38	23.8	24.1	0.5	0.3			1	Placebo	28.7786	7.21667	1.92874	a
	b	21	76.6	73	24.7288	23.5666	37.5	38.8	14.5	13.1	1.3	-1.4			2	EMS	29.4571	7.28494	1.94698	a	0.806388
	b	22	59.4	58.4	23.2031	22.8125	23.6	24.4	25.5	24.9	0.8	-0.6
	b	23	52.8	51.5	20.625	20.1172	23.5	23.9	18.4	17.7	0.4	-0.7				Post	Mean	SD	SEM	SAS	Pvalue
	b	24	56.5	55.1	22.69	22.1278	24.5	25	20.8	19	0.5	-1.8			1	Placebo	28.6286	7.10248	1.89822	a
	b	25	62.5	61.3	23.2377	22.7915	23.4	24.1	30.5	29.9	0.7	-0.6			2	EMS	30.2929	7.46824	1.99597	a	0.550952	1.02837
	b	26	53.5	51.5	20.3856	19.6235	21.6	22.5	22.7	22.5	0.9	-0.2
	b	27	48.5	47.2	22.4444	21.8428	20.7	21.4	21	19.6	0.7	-1.4			FBM(%)
	b	28	60.3	59.7	21.6214	21.4063	21.6	22.2	32.8	31.6	0.6	-1.2				Pre	Mean	SD	SEM	SAS	Pvalue
															1	Placebo	20.3357	5.29377	1.41482	a
															2	EMS	22.1286	6.36159	1.70021	a	0.425218
																Post	Mean	SD	SEM	SAS	Pvalue
															1	Placebo	22.7071	4.26208	1.13909	a			4.32537
															2	EMS	21.1714	7.06633	1.88856	a	0.493742	4.32537
															Delta LBM(kg)
																	Mean	SD	SEM	SAS	Pvalue
															1	Placebo	-0.15	0.94197	0.251752	a
															2	EMS	0.835714	0.439593	0.117486	b	0.00223413
															Delta FBM(%)
																	Mean	SD	SEM	SAS	Pvalue
															1	Placebo	2.37143	1.85987	0.497071	b
															2	EMS	-0.957143	1.32242	0.353431	a	1.41244e-05

## Sheet: Fatigue index
				Lactate (mmol/L)			NH3(umol/L)			glucose(mg/dL)
	SAS	No	Pre	Mid	Post	Pre	Mid	Post	Pre	Mid	Post			Lactate (mmol/L)
Placebo	a	1	1.28	2.505	1.12	67.05	94.4	69.224	91	92	91				Pre	Mean	SD	SEM	SAS	Pvalue
	a	2	1.34	3.39	1.48	68.7	94.7	70.9275	84	87	84			1	Placebo	1.46214	0.340998	0.0911356	a
	a	3	1.33	3.24	1.46	69.45	95	71.7018	80	80	82			2	EMS	1.44429	0.275757	0.0736991	a	0.880133
	a	4	1.59	4.425	1.99	64.2	89.2	66.2816	83	82	83
	a	5	1.16	3.21	1.44	53.55	87	55.2863	86	89	89				Mid	Mean	SD	SEM	SAS	Pvalue
	a	6	1.94	4.11	1.85	56.7	88.3	58.5384	97	97	100			1	Placebo	3.39857	0.547155	0.146233	a
	a	7	1.12	3.21	1.22	70.8	95.5	73.0955	78	78	77			2	EMS	3.21071	0.659519	0.176264	a	0.419787
	a	8	1.92	3.84	1.77	63.3	89.2	65.3524	101	101	102
	a	9	1.42	2.76	1.13	52.05	84.3	53.7376	82	81	83				Post	Mean	SD	SEM	SAS	Pvalue
	a	10	1.7	3.54	1.5	73.5	97.8	75.8831	85	89	88			1	Placebo	1.47786	0.29944	0.0800287	a
	a	11	1.74	3.57	1.65	62.4	89.1	64.4232	82	82	83			2	EMS	1.48929	0.229396	0.0613087	a	0.910672
	a	12	0.97	2.76	1.14	80.7	106.3	83.3165	91	96	97
	a	13	1.93	3.93	1.8	51.9	84.2	53.5828	84	89	85			NH3(umol/L)
	a	14	1.03	3.09	1.14	64.2	93.7	66.2816	78	79	81				Pre	Mean	SD	SEM	SAS	Pvalue
EMD	b	15	1.05	2.1	1.15	63.15	93.7	65.1975	88	94	91			1	Placebo	64.1786	8.46197	2.26156	a
	b	16	1.75	3.75	1.59	80.85	96.1	83.4714	95	96	92			2	EMS	65.7143	10.7566	2.87483	a	0.678234
	b	17	1.18	2.535	1.31	60.75	89.1	62.7197	87	90	85
	b	18	1.36	3.25	1.45	61.35	92.5	63.3392	86	89	83				Mid	Mean	SD	SEM	SAS	Pvalue
	b	19	1.71	3.705	1.58	80.85	100.9	83.4714	94	94	91			1	Placebo	92.05	5.93681	1.58668	a
	b	20	1.77	3.855	1.65	52.05	86.4	53.7376	87	91	91			2	EMS	92.3143	5.7654	1.54087	a	0.905805
	b	21	1.07	2.535	1.19	70.5	94.3	72.7858	82	87	81
	b	22	1.32	2.815	1.37	73.35	94.5	75.7282	97	98	97				Post	Mean	SD	SEM	SAS	Pvalue
	b	23	1.33	2.87	1.38	83	103.3	84.1	81	86	81			1	Placebo	66.2594	8.73633	2.33488	a
	b	24	1.85	4.29	1.95	68.55	93.8	70.7726	76	80	75			2	EMS	67.7313	10.9152	2.91721	a	0.697014
	b	25	1.28	2.64	1.36	52.5	86.7	54.2022	98	99	98
	b	26	1.33	3.03	1.44	61.2	92	63.1843	85	87	83			glucose(mg/dL)
	b	27	1.78	4.005	1.86	51.75	82	53.4279	96	98	97				Pre	Mean	SD	SEM	SAS	Pvalue
	b	28	1.44	3.57	1.57	60.15	87.1	62.1002	79	82	79			1	Placebo	85.8571	6.84844	1.83032	a
														2	EMS	87.9286	7.09783	1.89697	a	0.439087
															Mid	Mean	SD	SEM	SAS	Pvalue
														1	Placebo	87.2857	7.30046	1.95113	a
														2	EMS	90.7857	6.00229	1.60418	a	0.178067
															Post	Mean	SD	SEM	SAS	Pvalue
														1	Placebo	87.5	7.51153	2.00754	a
														2	EMS	87.4286	7.37683	1.97154	a	0.979941

## Sheet: Grip strength
			Left(kg)		Right(kg)		Delta left	Delta Right
	SAS	No	Pre	Post	Pre	Post	Post	Post			Left																		Mean	Mean	Mean	Mean	Mean
Placebo	a	1	41	43.6	45	47	2.6	2				Pre	Mean	SD	SEM	SAS	Pvalue		Pre-Post	Left	Right									#DIV/0!	#REF!	#REF!	#REF!
	a	2	46.7	47.5	43.3	44.3	0.8	1			1	Placebo	34.4071	10.3708	2.77171	a			Placebo	0.000797674	5.78186e-05									#DIV/0!	#REF!	#REF!	#REF!
	a	3	47.1	49.6	54.1	54.6	2.5	0.5			2	EMS	31.9643	10.2153	2.73015	a	0.535546		EMS	0.000119477	5.30367e-05									#DIV/0!	1.5	33.1857	10.293
	a	4	55.2	54.8	58.8	59.6	-0.4	0.8											Burner	#REF!	#REF!
	a	5	35.1	35.1	34.9	36.1	0	1.2				Post	Mean	SD	SEM	SAS	Pvalue
	a	6	39.7	41.9	43.4	46.6	2.2	3.2			1	Placebo	35.4429	10.4503	2.79296	a		1.0301
	a	7	37.3	37.6	39.4	39.7	0.3	0.3			2	EMS	34.7	9.82673	2.6263	a	0.847872	1.08559
	a	8	24.9	25.4	25.9	27.5	0.5	1.6
	a	9	21.2	22.6	19.5	20.1	1.4	0.6			Right
	a	10	25.6	26.3	30.4	32.5	0.7	2.1				Pre	Mean	SD	SEM	SAS	Pvalue
	a	11	27.6	28.6	27.1	29.4	1	2.3			1	Placebo	36.15	11.5148	3.07746	a
	a	12	29.1	30.3	26.8	28.8	1.2	2			2	EMS	35.15	10.8754	2.90658	a	0.815108
	a	13	24.8	25.5	28.5	30.4	0.7	1.9
	a	14	26.4	27.4	29	29.1	1	0.1				Post	Mean	SD	SEM	SAS	Pvalue
EMD	b	15	44.2	46.2	51.9	53.6	2	1.7			1	Placebo	37.55	11.4251	3.05347	a		1.03873
	b	16	40.6	43.3	45.4	46.3	2.7	0.9			2	EMS	39.5286	10.9943	2.93835	a	0.644463	1.12457
	b	17	49.3	50.1	50.3	59.2	0.8	8.9
	b	18	44	48.5	45.5	47.2	4.5	1.7			Delta Left
	b	19	30.3	34.4	33.7	37.1	4.1	3.4					Mean	SD	SEM	SAS	Pvalue
	b	20	35.5	36.7	39.3	46.1	1.2	6.8			1	Placebo	1.03571	0.892367	0.238495	a
	b	21	35.1	38.4	43	49.9	3.3	6.9			2	EMS	2.73571	1.89274	0.505857	b	0.00688749
	b	22	12.7	19.5	16.9	22.4	6.8	5.5
	b	23	28.1	32.9	29.1	33.1	4.8	4			Delta Right
	b	24	23.1	23.4	23.1	25.1	0.3	2					Mean	SD	SEM	SAS	Pvalue
	b	25	29.7	30.1	33.6	35.5	0.4	1.9			1	Placebo	1.4	0.897004	0.239734	a
	b	26	27.3	30.9	25.6	34.8	3.6	9.2			2	EMS	4.37857	2.78048	0.743113	b	0.0015754
	b	27	28.1	30.4	28.8	34.4	2.3	5.6
	b	28	19.5	21	25.9	28.7	1.5	2.8

## Sheet: CMJ
			RFD(N/kg*sec)		ForcePeak(N)		JumpHeight (cm)		Delta RFD	Delta FP	DeltaJH
	SAS	No	Pre	Post	Pre	Post	Pre	Post						RFD								Pre-Post	RFD	ForcePeak	JumpHeight
Placebo	a	1	5.51969	7.03252	1162.32	1225.51	37.2944	40.4636	1.51283	63.1861	3.1692				Pre	Mean	SD	SEM	SAS	Pvalue		Placebo	0.0025076	0.000114299	0.00259478
	a	2	5.542	6.83761	1316.95	1390.87	32.3495	34.454	1.29561	73.9252	2.10447			1	Placebo	8.02807	2.46025	0.657529	a			EMS	8.61238e-05	0.000256187	0.000936801
	a	3	4.05201	5.6182	998.876	1049.94	29.8158	36.0902	1.56619	51.0664	6.27445			2	EMS	8.02365	0.993884	0.265627	a	0.995104		Burner	#REF!	#REF!	#REF!
	a	4	9.73231	10.0152	1349.85	1378.14	30.3	33.7	0.282843	28.2945	3.4
	a	5	13.3153	14.0019	1749.74	1795.28	28.3061	31.1587	0.68659	45.538	2.85258				Post	Post	SD	SEM	SAS	Pvalue
	a	6	6.64988	6.6166	886.517	916.068	30.3738	33.7641	-0.033284	29.5506	3.3903			1	Placebo	8.95079	2.32774	0.622116	a		1.11494
	a	7	8.83561	9.01949	755.7	807.778	27.9	29.1	0.183878	52.0782	1.2			2	EMS	9.11968	1.23774	0.330801	a	0.813027	1.1366
	a	8	8.35644	8.86941	610.353	720.445	21.609	20.6928	0.512972	110.092	-0.916177
	a	9	8.16806	8.59068	787.775	790.847	22.8981	22.4796	0.422623	3.07199	-0.41846			ForcePeak
	a	10	9.51089	12.5096	831.413	936.158	24.1131	24.082	2.9987	104.745	-0.0310742				Pre	Mean	SD	SEM	SAS	Pvalue
	a	11	7.66873	8.35023	656.36	693.156	26.3053	25.6961	0.681502	36.7956	-0.609233			1	Placebo	973.996	325.135	86.8961	a
	a	12	6.95681	9.18331	794.633	776.528	24.7111	26.3647	2.2265	-18.1049	1.65359			2	EMS	980.025	237.298	63.4205	a	0.955777
	a	13	6.66217	7.66286	668.57	761.258	20.4919	26.4876	1.00069	92.6878	5.99564
	a	14	11.4231	11.0035	1066.89	1149.67	25.9753	29.8944	-0.419614	82.7774	3.9191				Post	Mean	SD	SEM	SAS	Pvalue
EMD	b	15	7.76801	9.84188	1134.41	1220.63	38.5624	39.1119	2.07387	86.2213	0.549535			1	Placebo	1027.97	323.928	86.5735	a		1.05542
	b	16	8.18971	9.16352	1010.25	1167.37	35.7	37.1	0.973811	157.118	1.4			2	EMS	1047.51	244.322	65.2978	a	0.858547	1.06886
	b	17	7.71795	8.01377	1528.24	1566.88	34.8579	33.9404	0.295824	38.6378	-0.917566
	b	18	9.98411	10.2213	1024.66	1058.49	43.875	45.7348	0.237139	33.8259	1.85971			JumpHeight
	b	19	9.25605	11.2358	1081.49	1116.67	27.9	34.8	1.97972	35.1786	6.9				Pre	Mean	SD	SEM	SAS	Pvalue
	b	20	8.79321	9.21841	996.365	1082.19	30.5026	31.4	0.425192	85.8295	0.897377			1	Placebo	27.3174	4.55098	1.2163	a
	b	21	7.82029	8.78142	1353.81	1454.75	38.5	44.2	0.961127	100.937	5.7			2	EMS	28.6492	8.47229	2.26432	a	0.61005
	b	22	8.09038	9.43878	823.902	926.995	23.8162	25.6287	1.3484	103.093	1.81255
	b	23	8.27732	8.95269	775.849	891.177	25.146	27.1864	0.675366	115.328	2.0404				Post	Mean	SD	SEM	SAS	Pvalue
	b	24	8.09928	10.7285	813.267	943.608	21.2698	23.9	2.62919	130.341	2.63016			1	Placebo	29.602	5.66025	1.51276	a		1.08363
	b	25	7.53135	7.95883	916.159	892.976	22.2738	24.1	0.427482	-23.1832	1.82619			2	EMS	31.0093	8.40946	2.24752	a	0.608454	1.08238
	b	26	6.40094	7.13316	708.097	735.452	23.9729	25.632	0.732218	27.3547	1.65914
	b	27	6.11578	7.15982	782.8	816.756	19.1	23.8	1.04404	33.9559	4.7			Delta RFD
	b	28	8.28676	9.82771	771.036	791.17	15.6125	17.596	1.54095	20.1337	1.98352					Mean	SD	SEM	SAS	Pvalue
														1	Placebo	0.922717	0.924872	0.247182	a
														2	EMS	1.09602	0.732197	0.195688	a	0.587452
														Delta FP
																Mean	SD	SEM	SAS	Pvalue
														1	Placebo	53.9788	37.1679	9.93353	a
														2	EMS	67.4836	50.8048	13.5781	a	0.430076
														DeltaJH
																Mean	SD	SEM	SAS	Pvalue
														1	Placebo	2.2846	2.30099	0.614966	a
														2	EMS	2.36007	2.07488	0.554536	a	0.928083
